# Supplementary material
Source: PubMed Central journal article supplement (PMC6325500)
Supplement: ajtr0010-4141-f7.pdf [file ajtr0010-4141-f7.pdf]

## Isoliquiritigenin attenuates LPS-induced AKI

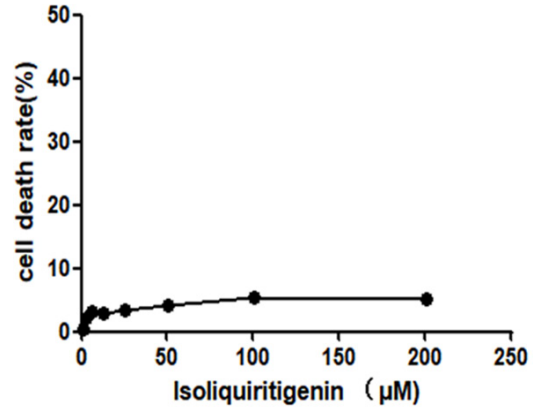

**Figure S1.** The cytotoxicity test by CCK-8. The dosage was from 1.5 μM, 3.125 μM, 6.25 μM, 12.5 μM, 50 μM, 100 μM to 200 μM. The dosage 50 μM and 100 μM didn't show serious cell death rate.
